# Supplementary material for: Organometallic platinum(ii) complexes of methyl-substituted phenanthrolines
Source: Royal Society of Chemistry journal article supplement (doi:10.1039/b201419j), 2002-01-01
Supplement: b201419j(1).doc [file b201419j%281%29.doc]

**Table S1.** Analytical data for new mesitylplatinum complexes [(N^N)PtMes2]

|  |  |  |  | 1H-NMRa | | |  |  |  |  | C,H,N analysis b |
| --- | --- | --- | --- | --- | --- | --- | --- | --- | --- | --- | --- |
| N^N | H2,9 | H3,8 | H4,7 | | H5,6 | CH3 | | HMes | oCH3 | pCH3 | found C, H, N |
| 2,9-dmphen | - | 7.60d | 8.32d | | 7.85s | 2.78s | | 6.51s | 2.42s | 2.06s | 59.85, 5.31, 4.34 |
| 3,8-dmphen | 8.26d | - | 8.72d | | 8.11s | 2.46s | | 6.55s | 2.37s | 2.14s | 59.77, 5.29, 4.28 |
| 4,7-dmphen | 8.30d | 7.80d | - | | 8.33s | 2.75s | | 6.54s | 2.37s | 2.12s | 59.81, 5.31, 4.36 |
| 5,6-dmphen | 9.04dd | 7.96dd | 8.43dd | | - | 2.79s | | 6.55s | 2.37s | 2.13s | 59.71, 5.28, 4.32 |

a Chemical shifts  in ppm as measured in dmso-d6. b Calculated for C32H34N2Pt (641.73) C: 59.89, H: 5.34, N: 4.37%.
