# Supplementary material for: Organometallic platinum(ii) complexes of methyl-substituted phenanthrolines
Source: Royal Society of Chemistry journal article supplement (doi:10.1039/b201419j), 2002-01-01
Supplement: b201419j(2).doc [file b201419j%282%29.doc]

**Figure S1**
